# Supplementary material for: HotSPOT: A Computational Tool to Design Targeted Sequencing Panels to Assess Early Photocarcinogenesis
Source: MDPI journal article supplement (doi:10.3390/cancers15051612), 2023-03-05
Supplement: s1 [file s1]

Supplementary Table 1: Comparison of base pairs shared between 10,000 bp sequencing panel design of three datasets.

| Dataset Comparison                  | Percent Overlap |
|-------------------------------------|-----------------|
| Dataset A vs Dataset B              | 36.58%          |
| Dataset A vs Dataset C              | 41.71%          |
| Dataset B vs Dataset C              | 28.26%          |
| Dataset A vs Dataset B vs Dataset C | 20.42%          |

Supplementary Table 2: Example data table of .csv file format required for hotSPOT.

| gene   | chr | pos      |
|--------|-----|----------|
| ARID1A | 1   | 27087486 |
| FAT1   | 4   | 1.88E+08 |
| MLL3   | 7   | 1.52E+08 |
| TRIOBP | 22  | 38151115 |
| FGFR2  | 10  | 1.23E+08 |
| SMAD4  | 18  | 48593495 |
| CCND1  | 11  | 69456219 |
| SALL1  | 16  | 51174418 |
| CREBBP | 16  | 3786799  |
| NOTCH3 | 19  | 15300208 |
| TP53   | 17  | 7578370  |
| NF1    | 17  | 29587399 |
| SMAD4  | 18  | 48593495 |
| PTEN   | 10  | 89624297 |
| TP53   | 17  | 7578176  |

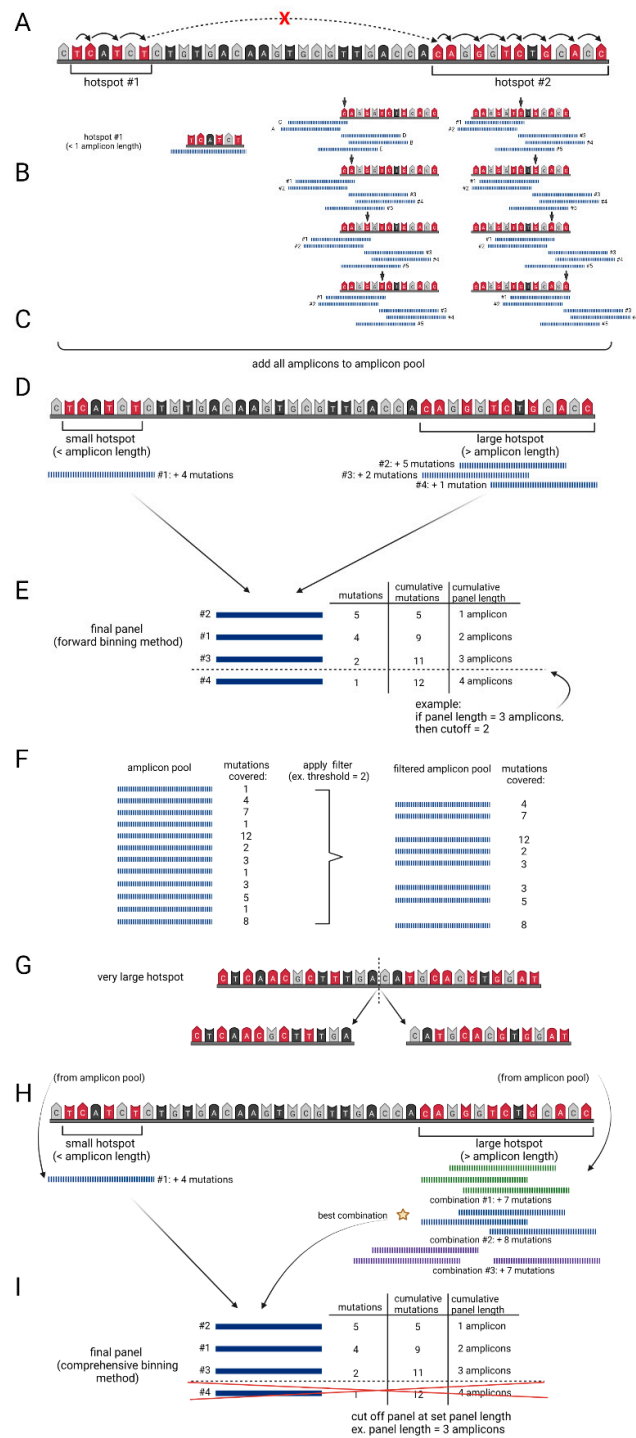

Supplementary Figure 1: Overview of hotSPOT forward and comprehensive binning algorithms

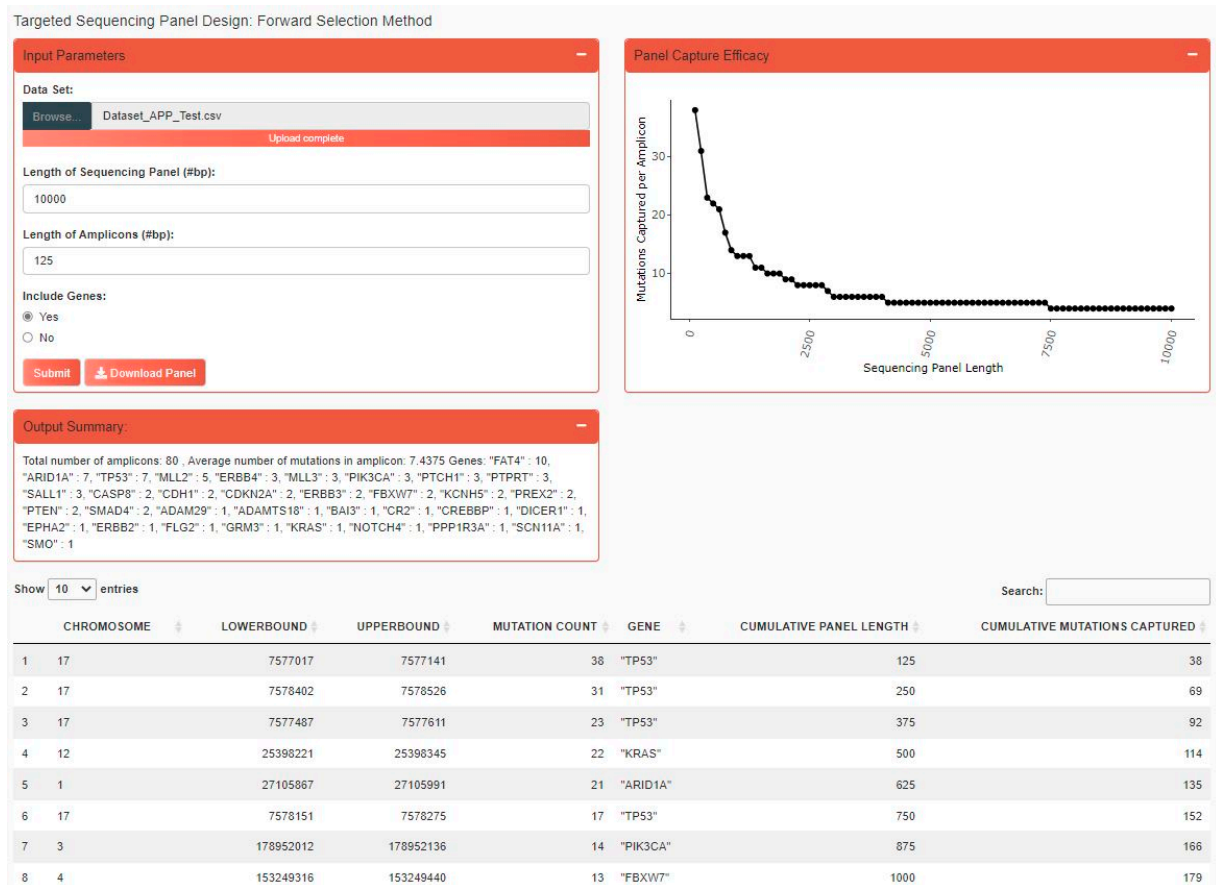

Supplementary Figure 2: Visual representation of the forward algorithm hotSPOT R Shiny web application. User inputs .csv file of mutation dataset, desired length of sequencing panel and amplicon length. Application will output plot of panel capture efficacy, summary of mutation capture and genes included, and table of sequencing panel. Panel may be downloaded as .csv file.

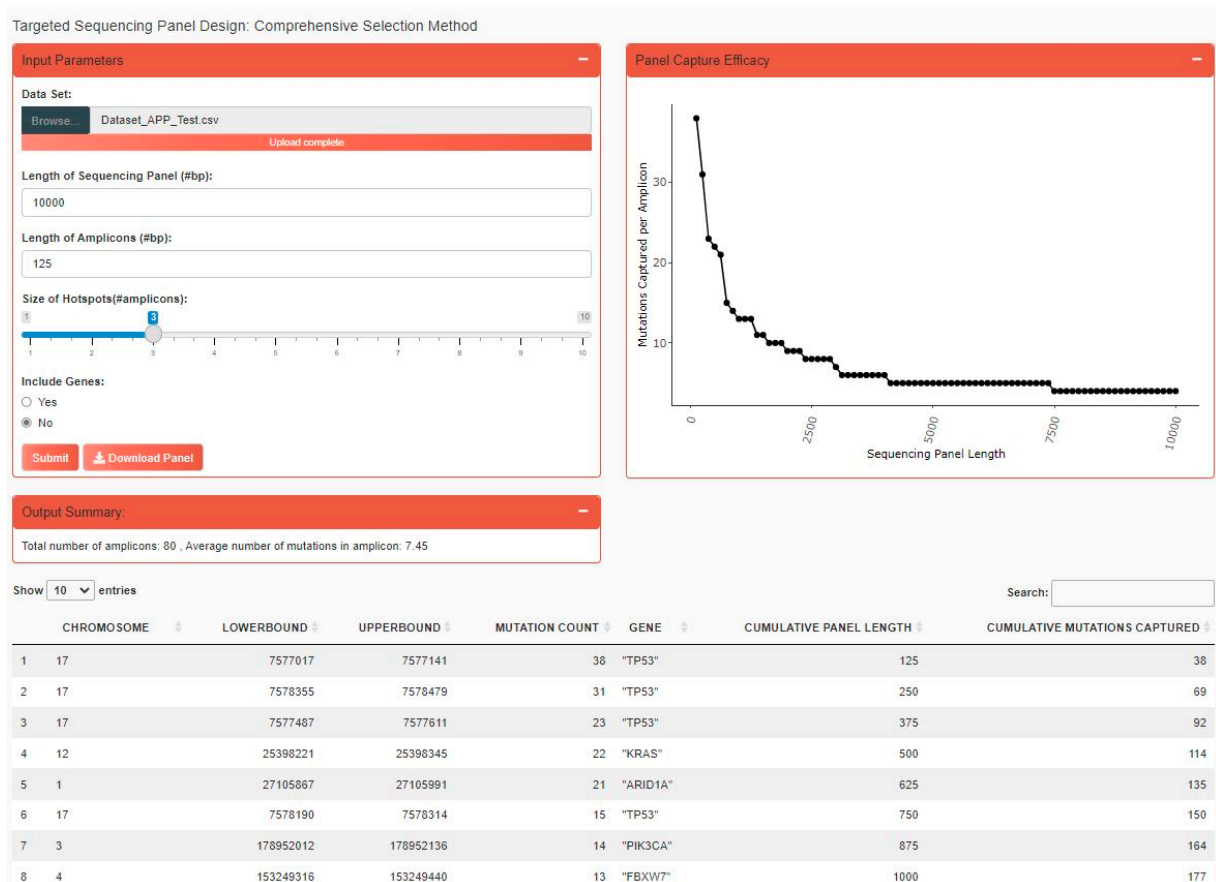

Supplementary Figure 3: Visual representation of the comprehensive algorithm hotSPOT R Shiny web application. User inputs .csv file of mutation dataset, desired length of sequencing panel, amplicon length, and size of hotspots desired (Increasing hotspot size will increase capture efficacy, however also increase computation time). Application will output plot of panel capture efficacy, summary of mutation capture and genes included, and table of sequencing panel. Panel may be downloaded as .csv file.
